# Supplementary material for: Optimizing Alkyl Side Chains in Difluorobenzene–Rhodanine Small-Molecule Acceptors for Organic Solar Cells
Source: MDPI journal article supplement (doi:10.3390/ma17081875), 2024-04-18
Supplement: s1 [file s1]

*Supplementary Materials*

# Optimizing Alkyl Side Chains in Difluorobenzene–Rhodanine Small-Molecule Acceptors for Organic Solar Cells

Jongchan Choi <sup>1</sup>, Chang Eun Song <sup>2</sup> and Eunhee Lim <sup>3,\*</sup>

<sup>1</sup> Department of Chemistry, Kyonggi University, Suwon 16227, Republic of Korea

<sup>2</sup> Korea Research Institute of Chemical Technology, Daejeon 34114, Republic of Korea

<sup>3</sup> Department of Applied Chemistry, University of Seoul, Seoul 02504, Republic of Korea

\* Correspondence: ehlim@uos.ac.kr; Tel.: +82-2-2460-2465

**$^1\text{H}$  NMR spectra**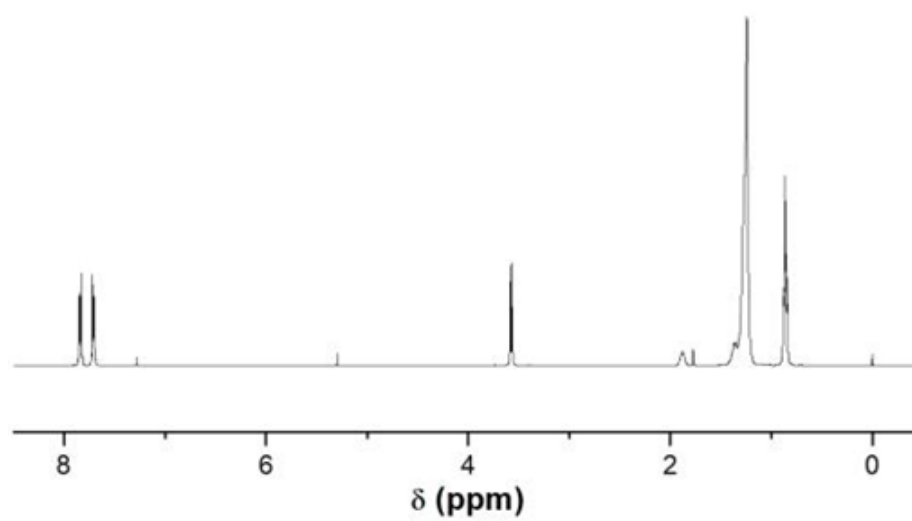**Figure S1.**  $^1\text{H}$  NMR spectrum of HDphth.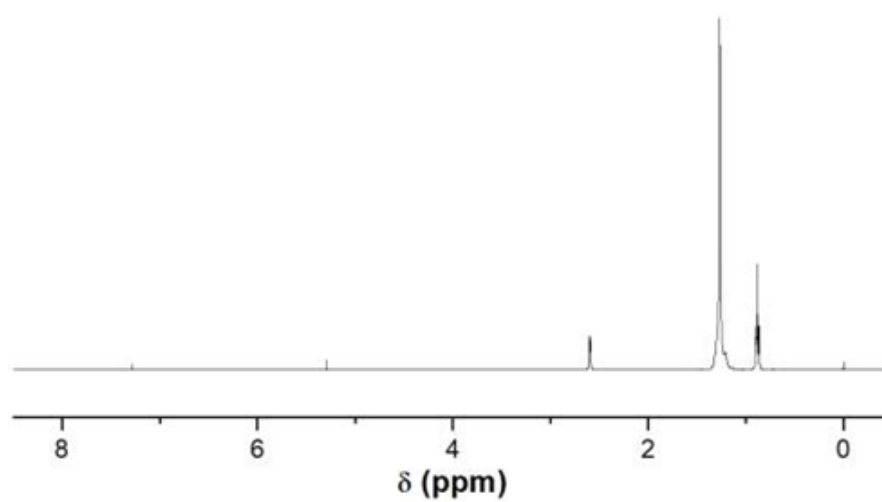**Figure S2.**  $^1\text{H}$  NMR spectrum of HDNH<sub>2</sub>.

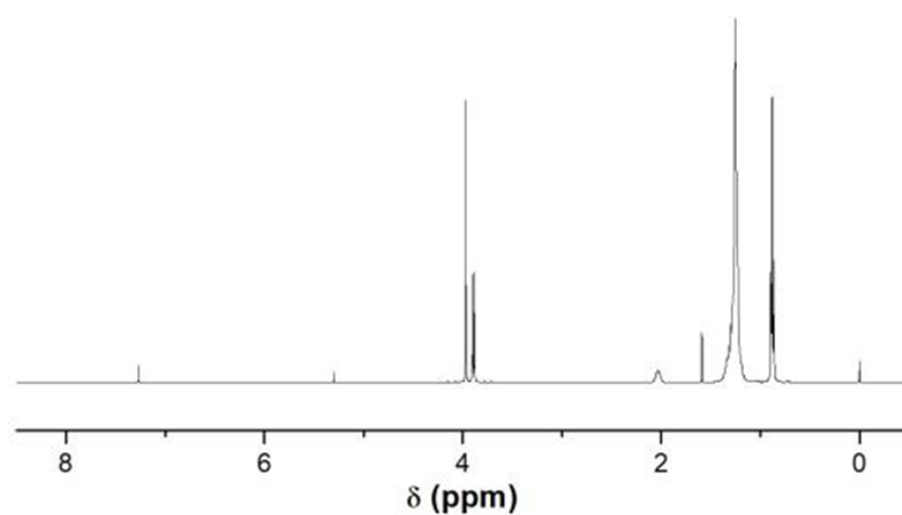

Figure S3.  $^1\text{H}$  NMR spectrum of HDRH.

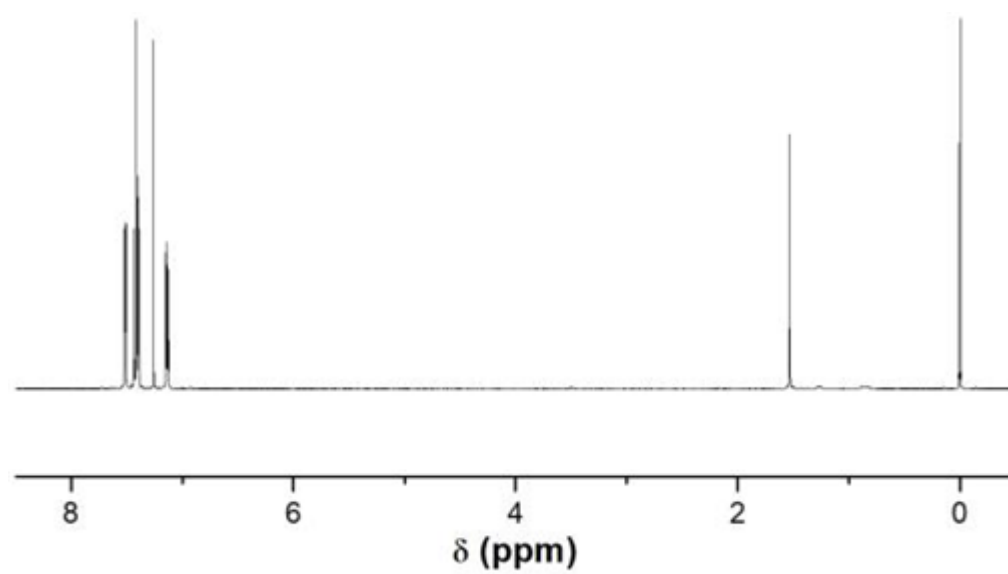

Figure S4.  $^1\text{H}$  NMR spectrum of T-2FB-T.

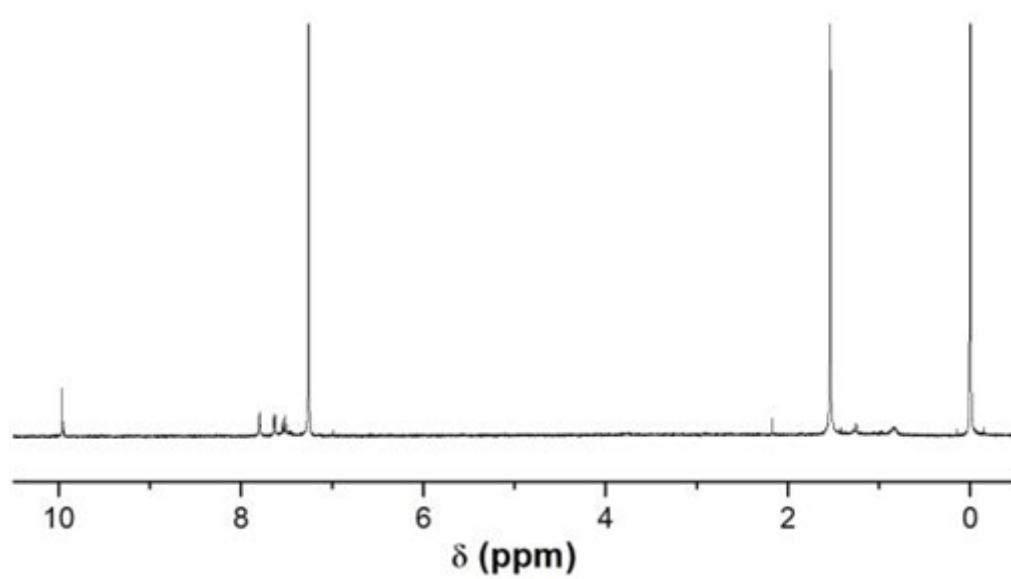

Figure S5.  $^1\text{H}$  NMR spectrum of T-2FB-T-CHO.

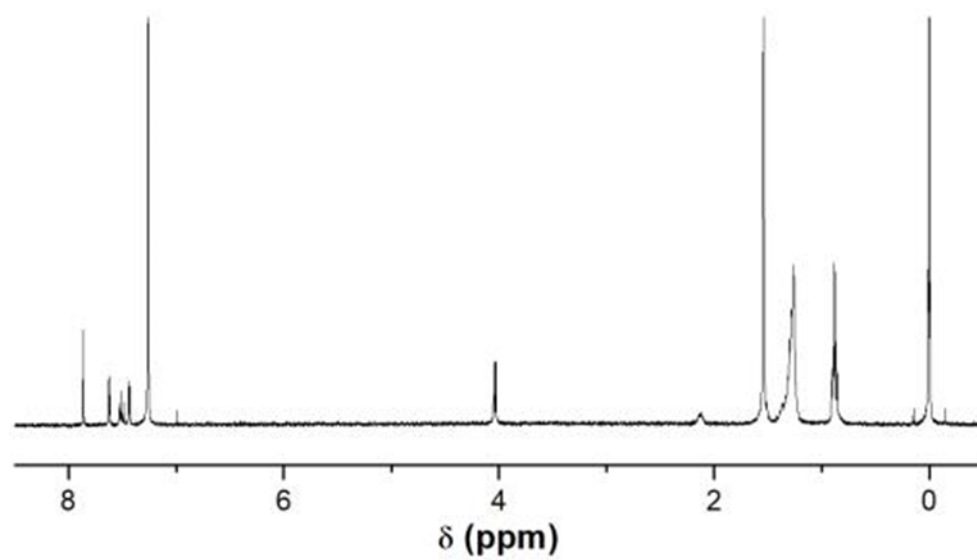

Figure S6.  $^1\text{H}$  NMR spectrum of T-2FB-BORH.

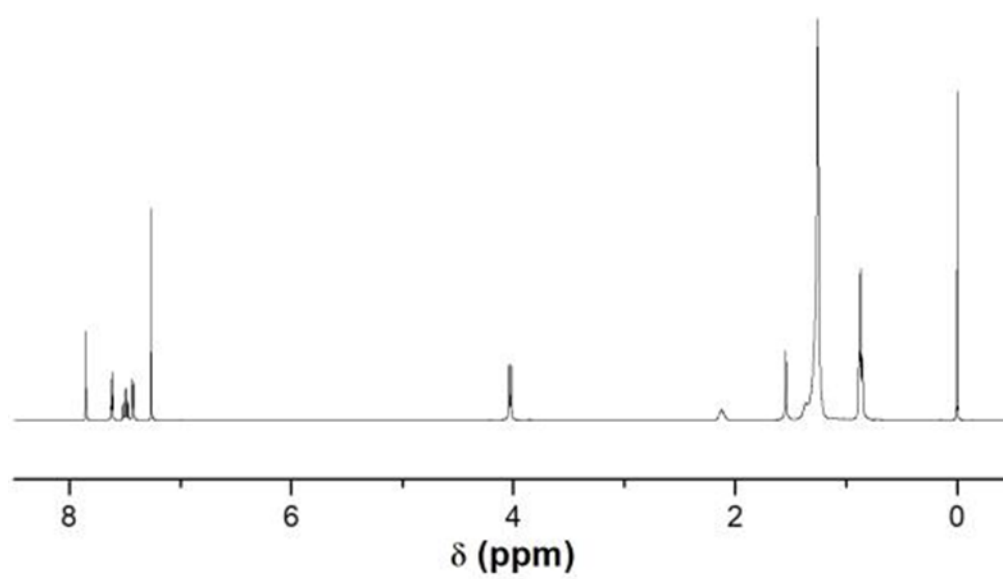

Figure S7.  $^1\text{H}$  NMR spectrum of T-2FB-HDRH.
